# Supplementary material
Source: Springer Nature journal article supplement (https://www.springermedizin.de/resource/supplementary/12993_2007_109_MOESM2_ESM.pdf/9617092)

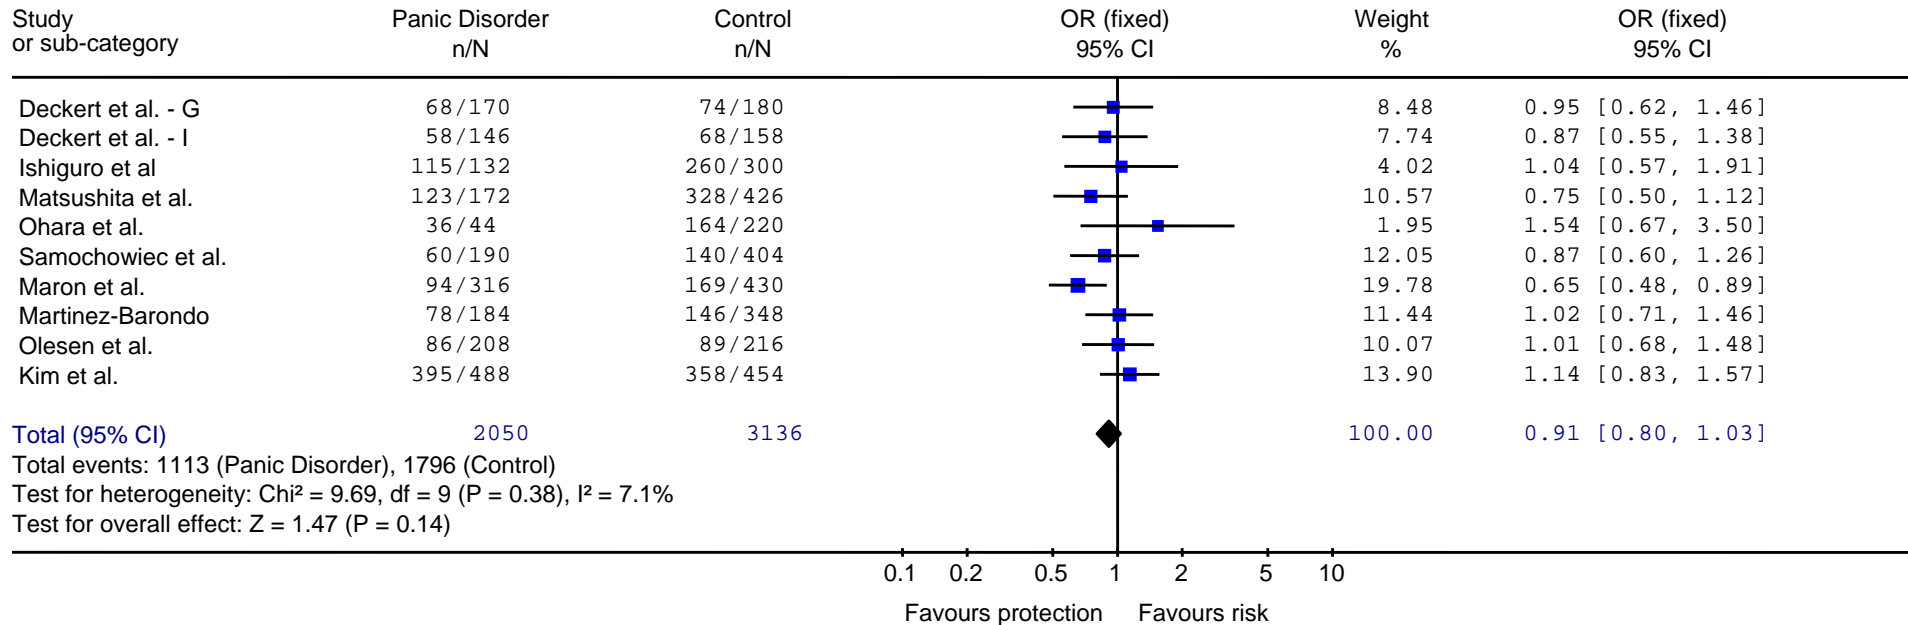

Supplement: MOESM2 [file 9617092]
